# Supplementary material for: Hürthle Cells on Fine-Needle Aspiration Cytology Are Important for Risk Assessment of Focally PET/CT FDG Avid Thyroid Nodules
Source: MDPI journal article supplement (doi:10.3390/cancers12123544), 2020-11-27
Supplement: s1 [file s1]

# Hürthle Cells on Fine-Needle Aspiration Cytology are Important for Risk Assessment of Focally PET/CT FDG Avid Thyroid Nodules

David N. Poller, Hakim Megadmi, Matthew J.A. Ward and Pierpaolo Trimboli

**Table S1.** Malignant Cases: Patient characteristics, PET/CT Findings, *SUV<sub>max</sub>*, Nodule Size, British Thyroid Association ‘U’ Category, Thy Cytological Category, Cytological and Histopathological Diagnoses (UICC stage TNM VIII)

| Case | Sex | Clinical Characteristics                                            | PET/CT Findings                                        | SUV Max | US Nodule size (mm)                                         | BTA ‘U’ category | Thy category | Cytology Diagnosis                                                                                     | Histology Diagnosis                     |
|------|-----|---------------------------------------------------------------------|--------------------------------------------------------|---------|-------------------------------------------------------------|------------------|--------------|--------------------------------------------------------------------------------------------------------|-----------------------------------------|
| 1    | F   | pulmonary nodules & lymph nodes suspicious of metastatic thyroid Ca | Right calcified thyroid gland nodule                   | 2.7     | 28                                                          | 4                | 5            | consistent with carcinoma, metastasis cannot be entirely excluded                                      | 34 mm follicular thyroid carcinoma, pT2 |
| 2    | F   | squamous cell carcinoma anus, lung & spleen metastases              | Right thyroid lobe                                     | 9.4     | not stated                                                  | 4                | 5            | in keeping with metastatic anal carcinoma                                                              | None, primary anal adeno-carcinoma      |
| 3    | F   | endometrial adeno-carcinoma post radiotherapy                       | Inferior right thyroid + posterior right thyroid gland | 6.1     | 24 (multiple)                                               | 5                | 5            | papillary thyroid carcinoma                                                                            | 15mm papillary thyroid carcinoma, pT1a  |
| 4    | F   | thyroid mass, enlarged lymph nodes cervical levels III & IV         | Left thyroid nodule                                    | 5.4     | not stated<br>infiltrating mass replacing left thyroid lobe | 5                | 4            | numerous cells with nuclear pleomorphism and atypia compatible with a neoplasm (non-papillary thyroid) | Hodgkin’s Lymphoma                      |

|    |   |                                                                          |                                                                           |      |                        |            |    |                                                                                                           | carcinoma or lymphoma)                                                        |
|----|---|--------------------------------------------------------------------------|---------------------------------------------------------------------------|------|------------------------|------------|----|-----------------------------------------------------------------------------------------------------------|-------------------------------------------------------------------------------|
| 5  | M | hypercalcemia<br>osteolytic<br>fracture of<br>femur, cystic<br>neck mass | Left thyroid<br>soft tissue<br>posterior<br>margin large<br>cystic nodule | 8.9  | 46                     | 4          | 1  | cystic lesion                                                                                             | carcinoma of<br>parathyroid,<br>cystic with<br>necrotic<br>material           |
| 6  | F | previous PTC<br>thyroid &<br>endometrial<br>adeno-<br>carcinoma          | Left thyroid<br>locally<br>infiltrating                                   | 8.7  | 14 (invades<br>larynx) | not stated | 5  | pleomorphic<br>nuclei,<br>grooving and<br>chromatin<br>condensation,<br>papillary<br>thyroid<br>carcinoma | none,<br>(cytology<br>showed<br>papillary<br>thyroid<br>carcinoma)            |
| 7  | M | B cell<br>lymphoma<br>cutaneous<br>nodule arm                            | Left thyroid                                                              | 4.1  | 30                     | 3          | 3f | small amount<br>of colloid<br>within blood,<br>follicular<br>thyroid<br>neoplasm                          | 40mm<br>follicular<br>variant of<br>papillary<br>thyroid<br>carcinoma,<br>pT3 |
| 8  | F | adeno-<br>arcinoma<br>colon,<br>lung<br>metastases                       | Left thyroid                                                              | 11.0 | 15                     | 5          | 5  | cytologically<br>malignant-app<br>earing cells in<br>keeping with<br>metastatic<br>adenocarcino<br>ma     | none<br>(pancreatic<br>primary<br>adeno-<br>carcinoma)                        |
| 9  | M | squamous cell<br>carcinoma<br>lung                                       | Left thyroid                                                              | 3.4  | 12                     | 3          | 5  | metastatic<br>squamous cell<br>carcinoma<br>lung                                                          | None (primary<br>squamous cell<br>carcinoma in<br>bronchial<br>biopsy)        |
| 10 | F | cutaneous<br>malignant                                                   | Right thyroid                                                             | 7.6  | 16                     | 5          | 4  | suspicious of<br>papillary                                                                                | 22mm<br>multifocal                                                            |

|    |   |                                                        |                                       |            |                           |   |    |                                                                                                         |                                                                |
|----|---|--------------------------------------------------------|---------------------------------------|------------|---------------------------|---|----|---------------------------------------------------------------------------------------------------------|----------------------------------------------------------------|
|    |   | malignant melanoma with groin node metastasis          |                                       |            |                           |   |    | thyroid carcinoma                                                                                       | follicular variant papillary thyroid carcinoma pT2(m)          |
| 11 | F | malignant melanoma face with regional node involvement | Left thyroid                          | 3.3        | 6                         | 3 | 4  | suspicious of papillary thyroid carcinoma                                                               | 6mm papillary thyroid carcinoma pT1a                           |
| 12 | M | adeno-carcinoma oesophagus                             | Focal nodular uptake                  | not stated | 13mm left & 17 mm right   | 3 | 4  | suspicious of papillary thyroid carcinoma                                                               | none (but clinically papillary thyroid carcinoma not operated) |
| 13 | F | previous medullary thyroid carcinoma follow-up         | Right thyroid lobe                    | 4.1        | 47                        | 5 | 4  | ovoid spindled nuclei and pale pink cytoplasm suggestive of medullary carcinoma                         | 45mm medullary thyroid carcinoma, pT3a, pN0                    |
| 14 | F | recent onset left neck mass                            | Left thyroid bulky partly calcified   | 10.3       | 33 & 11                   | 4 | 3f | follicular thyroid epithelial cells with lymphoid cells without colloid, follicular neoplasm of thyroid | follicular lymphoma, areas up to grade 3B                      |
| 15 | F | papillary thyroid carcinoma on                         | Soft tissue thyroid bed into tracheal | 58.5       | not stated tumor invading | 5 | 5  | papillary thyroid carcinoma                                                                             | recurrent papillary thyroid                                    |

|    |   | long term<br>follow-up                                                | lumen                                                                  |      | anterior<br>trachea |            |    |                                                      | carcinoma                                                                         |
|----|---|-----------------------------------------------------------------------|------------------------------------------------------------------------|------|---------------------|------------|----|------------------------------------------------------|-----------------------------------------------------------------------------------|
| 16 | F | few weeks<br>history of new<br>neck mass                              | Nodules in<br>both lobes,<br>SUV <sub>max</sub> right<br>8.2/left 4.1. | 8.2  | 24                  | not stated | 3a | scanty cells<br>exclude<br>neuroendo-<br>crine tumor | medullary<br>thyroid<br>carcinoma                                                 |
| 17 | F | respiratory<br>symptoms, no<br>tumour<br>elsewhere<br>detected        | Right thyroid 2<br>metabolically<br>active foci                        | 39.0 | 14                  | 4          | 3f | neoplastic<br>thyroid cells in<br>sheets             | papillary<br>thyroid<br>carcinoma<br>pT1b,(m)                                     |
| 18 | M | lung nodules<br>consistent with<br>metastatic<br>thyroid<br>carcinoma | Right Thyroid<br>mass<br>extending into<br>mediastinum                 | 63.2 | 68                  | 5          | 3f | sheets of<br>thyroid<br>follicular cells             | pT4a follicular<br>thyroid<br>carcinoma,<br>oncocyctic,<br>adherent to<br>trachea |

**Table S2.** Hürthle Cell/Oncocytic Cases: Patient characteristics, PET/CT Findings, SUV<sub>max</sub>, Nodule Size, British Thyroid Association ‘U’ Category, Thy Cytological Category, Cytological and Histopathological Diagnoses.

| Case | Sex | Clinical<br>Characteristic<br>s                         | PET/CT<br>Findings | SUV <sub>max</sub> | US Nodule<br>size (mm) | BTA ‘U’<br>category | Thy<br>Category | Cytology<br>Diagnosis                                                                                                                                | Histology<br>Diagnosis             |
|------|-----|---------------------------------------------------------|--------------------|--------------------|------------------------|---------------------|-----------------|------------------------------------------------------------------------------------------------------------------------------------------------------|------------------------------------|
| 1    | F   | lymph-adenopathy &<br>bilateral<br>pleural<br>effusions | right thyroid      | 3.8                | 14                     | 2                   | 3f              | blood,<br>macrophages<br>& colloid in<br>keeping a<br>cystic thyroid<br>lesion. Many<br>cells oncocytic<br>appearing ?<br>degenerative<br>changes in | Infarcted<br>follicular<br>adenoma |

|   |   |                                            |                                                                                    |      |                     |            |    |                                                                                                             |                                                   |
|---|---|--------------------------------------------|------------------------------------------------------------------------------------|------|---------------------|------------|----|-------------------------------------------------------------------------------------------------------------|---------------------------------------------------|
|   |   |                                            |                                                                                    |      |                     |            |    | cyst or oncocytic follicular neoplasm.                                                                      |                                                   |
| 2 | F | anal squamous cell carcinoma               | right thyroid                                                                      | 30.0 | 14                  | 4          | 3f | clustered and single oncocytic cells                                                                        | follicular adenoma with variable oncocytic change |
| 3 | F | anal squamous cell carcinoma               | right thyroid                                                                      | 2.9  | 14                  | 3          | 3f | follicular neoplasm with oncocytic change                                                                   | NIFTP with associated oncocytic changes elsewhere |
| 4 | F | marginal zone lymphoma parotid             | right thyroid                                                                      | 15.1 | 2 nodules larger 14 | 3          | 3f | oncocytic follicular neoplasm                                                                               | none                                              |
| 5 | F | squamous cell carcinoma esophagus          | deep left parotid & central thyroid max + patchy uptake left & right thyroid lobes | 10.4 | 12                  | 5          | 3f | oncocytic cells in keeping with thyroid oncocytic/Hürthle cell neoplasm or Warthin tumour of salivary gland | none                                              |
| 6 | F | adeno-carcinoma lung                       | right thyroid anterior + left lobe posterior                                       | 19.7 | 40                  | 4          | 4  | oncocytic cells                                                                                             | adenomatoid nodules, focally oncocytic            |
| 7 | M | renal failure, chronic glomerulo-nephritis | right lobe                                                                         | 5.9  | not stated          | not stated | 3f | blood, rare thyrocytes partly follicular pattern and some cells                                             | none                                              |

|    |   |                               |                                      |      |    |            |    |                                                                                        |                              |
|----|---|-------------------------------|--------------------------------------|------|----|------------|----|----------------------------------------------------------------------------------------|------------------------------|
|    |   |                               |                                      |      |    |            |    | with abundant cytoplasm compatible with Hürthle cells                                  |                              |
| 8  | F | inflammatory polyarthritis    | left lobe                            | 5.8  | 9  | 3          | 3f | colloid and cells of oncocyctic type, an oncocyctic follicular neoplasm                | refused surgery-surveillance |
| 9  | M | diffuse large B cell lymphoma | right lobe                           | 7.3  | 36 | 3          | 3f | thyrocytes with Hürthle cell change, follicular neoplasm with oncocyctic change        | none                         |
| 10 | F | neuroendocrine tumour lung    | multifocal activity within thyroid   | 5.5  | 12 | 3          | 3f | blood, bland follicular epithelial cells, some of the cells have oncocyctic appearance | none                         |
| 11 | M | malignant mesothelioma        | left thyroid                         | 10.6 | 41 | 4          | 3f | oncocyctic follicular neoplasm                                                         | none                         |
| 12 | F | adenocarcinoma colon          |                                      | 12.0 | 19 | not stated | 3f | oncocyctic follicular neoplasm                                                         | none                         |
| 13 | F | adenocarcinoma lung           | Isthmus (previous hemithyroidectomy) | 5.0  | 14 | 2          | 3f | oncocyctic cells in second FNA                                                         | none                         |

|    |   |                                                                       |                                                          |      |            |   |    |                                                                                                                                                                                                  |                                    |
|----|---|-----------------------------------------------------------------------|----------------------------------------------------------|------|------------|---|----|--------------------------------------------------------------------------------------------------------------------------------------------------------------------------------------------------|------------------------------------|
| 14 | M | transient<br>ischaemic<br>attacks<br>exclude<br>autoimmune<br>disease | left thyroid<br>displaces the<br>trachea to the<br>right | 20.0 | 38         | 3 | 3f | oncocytic cells                                                                                                                                                                                  | oncocytic<br>follicular<br>adenoma |
| 15 | F | colorectal and<br>lung adeno-<br>carcinomas                           | left lobe                                                | 5.0  | not stated | 3 | 3a | bland<br>epithelial cells<br>with some<br>colloid with<br>some<br>macrophages<br>and changes<br>which will be<br>in-keeping<br>with cystic<br>degeneration,<br>few oncocytes<br>in second<br>FNA | none                               |

**Table S3.** Other Cases: Patient characteristics, PET/CT Findings, SUV<sub>max</sub>, Nodule Size, British Thyroid Association ‘U’ Category, Thy Cytological Category, Cytological and Histopathological Diagnoses.

| Case | Sex | Clinical characteristics                           | PET/CT findings                                  | SUV <sub>max</sub> | US nodule size (mm)                          | BTA ‘U’ category | Thy category | Cytology Diagnosis                                                                                                                            | Histology Diagnosis |
|------|-----|----------------------------------------------------|--------------------------------------------------|--------------------|----------------------------------------------|------------------|--------------|-----------------------------------------------------------------------------------------------------------------------------------------------|---------------------|
| 1    | M   | squamous cell carcinoma vocal cord                 | right thyroid gland most likely nodal metastasis | 5.6                | 10                                           | Not stated       | 1            | paucicellular preparation blood and lymphocytes, no colloid and no thyroid follicle epithelial cells                                          | none                |
| 2    | M   | cutaneous malignant melanoma metastatic to stomach | left thyroid                                     | 4.6                | No definite abnormal nodule identified on US | 2                | 1            | cellular aspirate lymphoid cells. No thyroid follicular cells are included and colloid is not a feature so thyroiditis or reactive lymph node | none                |
| 3    | F   | adenocarcinoma rectum, liver metastasis            | right thyroid                                    | 5.9                | 10                                           | 4                | 1            | insufficient cells for assessment                                                                                                             | none                |
| 4    | M   | adenocarcinoma rectum                              | right thyroid                                    | 2.2                | 18                                           | 3                | 1            | insufficient cells for assessment but could be a cyst                                                                                         | none                |
| 5    | F   | lung cavitory aspergillosis                        | right lobe                                       | 7.6                | 14                                           | 2                | 1            | colloid fibrinous                                                                                                                             | none                |



|    |   |                                             |                               |     |    |   |    |                                                                                     |                     |
|----|---|---------------------------------------------|-------------------------------|-----|----|---|----|-------------------------------------------------------------------------------------|---------------------|
|    |   |                                             |                               |     |    |   |    | material and blood                                                                  |                     |
| 6  | M | metastatic breast adeno-carcinoma           | left thyroid                  | 4.2 | 20 | 2 | 2  | blood, some colloid macrophages and small groups of epithelial cells without atypia | benign              |
| 7  | F | metastatic cutaneous malignant melanoma     | left thyroid nodule calcified | 5.0 | 17 | 4 | 3f | thyroid follicular cells in keeping with a follicular neoplasm                      | none                |
| 8  | F | breast adeno-carcinoma with lung metastases | left thyroid                  | 5.0 | 11 | 2 | 2  | benign                                                                              | none                |
| 9  | F | endometrial adenocarcinoma                  | left thyroid                  | 3.9 | 40 | 2 | 1c | Thy1c in 2 aspirates, consistent with a cystic lesion                               | none                |
| 10 | F | rheumatoid arthritis                        | left thyroid                  | 5.3 | 11 | 4 | 3a | series of repeat Thy1's with core biopsy = 'follicular neoplasm' Thy3f equivalent   | none                |
| 11 | F | carcino-sarcoma fallopian tube              | right thyroid                 | 4.6 | 23 | 3 | 2  | colloid, mixed inflammatory cells, macrophages                                      | hyperplastic nodule |

|    |   |                                                                           |                                     |     |                          |   |    |                                                                                                           |                       |
|----|---|---------------------------------------------------------------------------|-------------------------------------|-----|--------------------------|---|----|-----------------------------------------------------------------------------------------------------------|-----------------------|
|    |   |                                                                           |                                     |     |                          |   |    | + regular<br>follicular cells<br>consistent<br>with benign<br>colloid nodule                              |                       |
| 12 | F | rheumatoid<br>arthritis                                                   | right thyroid                       | 2.9 | 50                       | 3 | 3a | low cell yield<br>of bland<br>epithelial cells<br>without atypia<br>but without<br>significant<br>colloid | follicular<br>adenoma |
| 13 | F | pulmonary<br>neuroendocrin<br>e hyperplasia                               | left thyroid<br>and also<br>isthmus | 3.1 | 16 and 13<br>(2 nodules) | 2 | 1  | Thy1 aspirates<br>x 2                                                                                     | none                  |
| 14 | F | squamous cell<br>carcinoma<br>lung, right<br>parotid<br>Warthin<br>tumour | left thyroid                        | 4.7 | 26                       | 2 | 3a | follicular cells,<br>macrophages<br>and blood<br>without<br>colloid                                       | none                  |
